# Supplementary material
Source: MDPI journal article supplement (https://www.mdpi.com/2073-4395/13/10/2664)
Supplement: s1 [file s1]

## *Supplementary Material*

### Supplementary Tables

**Table S1.** Comparison of the mean absolute error (MAE), mean absolute percentage error (MAPE), root mean square error (RMSE), determination coefficient ( $R^2$ ), and the Akaike Information Criterion (AIC) of candidate SOC models.

| Episode                    | 1980   | 1980   | 1980       | 1980               | 2022   | 2022   | 2022               | 2022           |
|----------------------------|--------|--------|------------|--------------------|--------|--------|--------------------|----------------|
| Model                      | 1      | 2      | 3          | 4                  | 5      | 6      | 7                  | 8              |
| Nonlinearity*              | P      | P      | S          | S                  | P      | P      | S                  | S              |
| Climate                    | MAI    | PET10  | MAP<br>MAI | MAP10<br>MAI10     | MAT    | MAT10  | MAT10<br>MAI10     | PET10<br>MAI10 |
| Landscape                  | Slope  | Sope   | Slope      | Slope<br>Elevation | Slope  | Slope  | Slope<br>Elevation | Slope          |
| Management**               | GI     | GI     | GI         | GI                 | GI     | GI     | GI                 | GI             |
| Performance                |        |        |            |                    |        |        |                    |                |
| MAE (g kg <sup>-1</sup> )  | 2.99   | 2.61   | 0.96       | 1.01               | 3.16   | 3.13   | 1.49               | 2.24           |
| MAPE (%)                   | 22.31  | 20.08  | 6.41       | 6.73               | 29.73  | 29.92  | 16.05              | 21.61          |
| RMSE (g kg <sup>-1</sup> ) | 3.65   | 3.20   | 1.20       | 1.26               | 3.86   | 3.92   | 2.07               | 2.91           |
| R2                         | 0.70   | 0.77   | 0.92       | 0.91               | 0.87   | 0.86   | 0.93               | 0.88           |
| AIC                        | 148.25 | 141.96 | 116.03     | 119.11             | 189.74 | 190.71 | 169.88             | 189.03         |
| Score                      |        |        |            |                    |        |        |                    |                |
| MAE                        | 4      | 3      | 1          | 2                  | 4      | 3      | 1                  | 2              |
| MAPE                       | 4      | 3      | 1          | 2                  | 3      | 4      | 1                  | 2              |
| RMSE                       | 4      | 3      | 1          | 2                  | 3      | 4      | 1                  | 2              |
| R2                         | 4      | 3      | 1          | 2                  | 3      | 4      | 1                  | 2              |
| AIC                        | 4      | 3      | 1          | 2                  | 3      | 4      | 1                  | 2              |
| Total score                | 24     | 15     | 5          | 10                 | 16     | 19     | 5                  | 10             |
| Rank                       | 4      | 3      | 1          | 2                  | 3      | 4      | 1                  | 2              |

\* P, third order polynomial function; S, cubic spline function.

\*\* GI, grazing intensity.

**Table S2.** SOC model coefficients for episode 1980.

| <b>Regressor</b>   | <b>Type</b>  | <b>Coefficient</b> | <b>t-value</b> | <b>p</b> |
|--------------------|--------------|--------------------|----------------|----------|
| slope              | Linear       | 2.28               | 3.18           | 0.0214   |
| Land use intensity |              |                    |                |          |
| G0                 | Intercept    | 12.18              | 6.34           | 0.0010   |
| G1                 | Intercept    | 22.48              | 3.10           | 0.0236   |
| G2                 | Intercept    | 11.85              | -0.16          | 0.8793   |
| G3                 | Intercept    | 3.87               | -4.41          | 0.0056   |
|                    |              |                    | F-value        |          |
| MAP                | Nonlinear    |                    | 3.27           | 0.0997   |
| Order 1            | Cubic spline | -18.73             |                |          |
| Order 2            | Cubic spline | -23.86             |                |          |
| Order 3            | Cubic spline | -16.93             |                |          |
| Order 4            | Cubic spline | -5.52              |                |          |
| Order 5            | Cubic spline | 29.96              |                |          |
| Order 6            | Cubic spline | 35.62              |                |          |
| Order 7            | Cubic spline | 45.01              |                |          |
| Order 8            | Cubic spline | 29.03              |                |          |
| Order 9            | Cubic spline | 19.51              |                |          |
| MAI                | Nonlinear    |                    | 4.95           | 0.0396   |
| Order 1            | Cubic spline | 21.11              |                |          |
| Order 2            | Cubic spline | 23.98              |                |          |
| Order 3            | Cubic spline | 19.78              |                |          |
| Order 4            | Cubic spline | 4.08               |                |          |
| Order 5            | Cubic spline | -28.57             |                |          |
| Order 6            | Cubic spline | -45.65             |                |          |
| Order 7            | Cubic spline | -41.34             |                |          |
| Order 8            | Cubic spline | -33.00             |                |          |
| Order 9            | Cubic spline | -8.07              |                |          |

**Table S3.** SOC model coefficients for episode 2022.

| <b>Regressor</b>   | <b>Type</b>  | <b>Coefficient</b> | <b>t-value</b> | <b>p</b> |
|--------------------|--------------|--------------------|----------------|----------|
| Slope              | Linear       | 2.82               | 3.21           | 0.0066   |
| Elevation          | Linear       | 0.05               | 2.78           | 0.0146   |
| Land use intensity |              |                    |                |          |
| G0                 | Intercept    | -42.80             | 4.41           | 0.0056   |
| G1                 | Intercept    | -18.25             | 5.50           | 1.49e-4  |
| G2                 | Intercept    | -21.07             | 3.68           | 1.02e-3  |
| G3                 | Intercept    | -11.48             | 1.92           | 8.21e-6  |
|                    |              |                    | F-value        |          |
| MAT10              | Nonlinear    |                    | 8.99           | 2.79e-4  |
| Order 1            | Cubic spline | 4.58               |                |          |
| Order 2            | Cubic spline | 0.99               |                |          |
| Order 3            | Cubic spline | -5.54              |                |          |
| Order 4            | Cubic spline | -23.38             |                |          |
| Order 5            | Cubic spline | -16.41             |                |          |
| Order 6            | Cubic spline | -11.88             |                |          |
| Order 7            | Cubic spline | -6.35              |                |          |
| Order 8            | Cubic spline | -13.80             |                |          |
| Order 9            | Cubic spline | 1.29               |                |          |
| MAI10              | Nonlinear    |                    | 2.18           | 0.0830   |
| Order 1            | Cubic spline | -1.21              |                |          |
| Order 2            | Cubic spline | -0.94              |                |          |
| Order 3            | Cubic spline | 3.23               |                |          |
| Order 4            | Cubic spline | 8.95               |                |          |
| Order 5            | Cubic spline | 8.04               |                |          |
| Order 6            | Cubic spline | 8.83               |                |          |
| Order 7            | Cubic spline | 2.00               |                |          |
| Order 8            | Cubic spline | 8.18               |                |          |
| Order 9            | Cubic spline | -4.87              |                |          |

**Table S4.** The mean, median, standard error, and lower and upper limits of the 95% confidence interval of the SOC covariates' relative importance in explaining the SOC variabilities based on a bootstrap evaluation of 1,000 replications. Different letters in parentheses indicate significant differences at  $p < 0.05$ .

| <b>Covariate</b>  | <b>Mean (%)</b> | <b>Median (%)</b> | <b>SE (%)</b> | <b>Lower (%)</b> | <b>Upper (%)</b> |
|-------------------|-----------------|-------------------|---------------|------------------|------------------|
| Episode 1980s     |                 |                   |               |                  |                  |
| Climate           | 13.66 (e)       | 11.43 (e)         | 0.31          | 2.97             | 46.42            |
| MAP               | 7.18            | 5.82              | 0.17          | 1.51             | 26.54            |
| MAI               | 6.48            | 5.41              | 0.15          | 1.50             | 24.71            |
| Landscape         | 37.53 (c)       | 36.89 (c)         | 0.50          | 9.86             | 70.44            |
| Slope             | 37.53           | 36.89             | 0.50          | 9.86             | 70.44            |
| Management        | 48.81 (b)       | 49.09 (b)         | 0.48          | 20.06            | 78.07            |
| Grazing intensity | 48.81           | 49.09             | 0.48          | 20.06            | 78.07            |
| Episode 2022      |                 |                   |               |                  |                  |
| Climate           | 65.45 (a)       | 66.14 (a)         | 0.35          | 41.00            | 85.16            |
| MAT10             | 39.38           | 39.16             | 0.21          | 27.00            | 53.60            |
| MAI10             | 26.07           | 26.21             | 0.22          | 12.93            | 39.20            |
| Landscape         | 19.15 (d)       | 17.52 (d)         | 0.29          | 7.07             | 43.91            |
| Slope             | 7.07            | 5.54              | 0.18          | 1.20             | 26.54            |
| Elevation         | 12.08           | 11.90             | 0.17          | 2.23             | 23.39            |
| Management        | 15.39 (e)       | 15.40 (e)         | 0.24          | 3.32             | 30.60            |
| Grazing intensity | 15.39           | 15.40             | 0.24          | 3.32             | 30.60            |

## Supplementary Figure

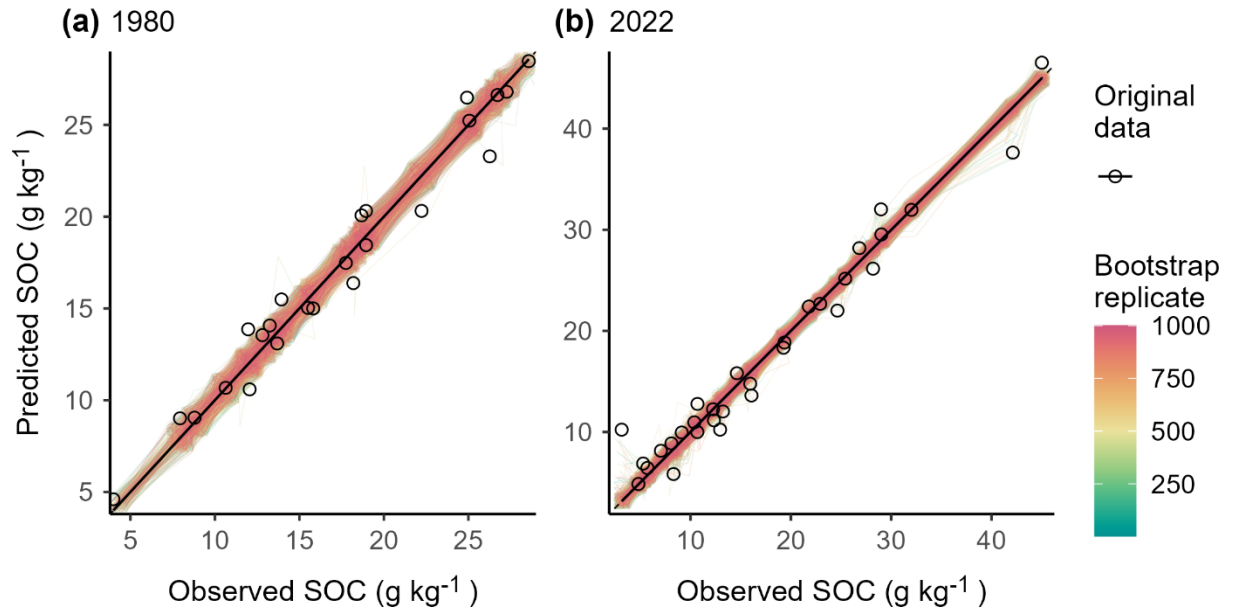

**Figure S1.** Comparison between the field-observed and model-predicted SOC contents. Each color line represents one model prediction using bootstrapping (N = 1,000).
